# Supplementary material for: Hydrogen-bonded macrocycle-mediated dimerization for orthogonal supramolecular polymerization
Source: publisher site journal article supplement (doi:10.3762/bjoc.21.10), 2025-01-17

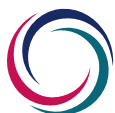

## Supporting Information

for

### Hydrogen-bonded macrocycle-mediated dimerization for orthogonal supramolecular polymerization

Wentao Yu, Zhiyao Yang, Chengkan Yu, Xiaowei Li and Lihua Yuan

*Beilstein J. Org. Chem.* **2025**, *21*, 179–188. [doi:10.3762/bjoc.21.10](https://doi.org/10.3762/bjoc.21.10)

### CheckCIF report for H2 $\supset$ G1

# checkCIF/PLATON report

Structure factors have been supplied for datablock(s) 4bp

THIS REPORT IS FOR GUIDANCE ONLY. IF USED AS PART OF A REVIEW PROCEDURE FOR PUBLICATION, IT SHOULD NOT REPLACE THE EXPERTISE OF AN EXPERIENCED CRYSTALLOGRAPHIC REFEREE.

No syntax errors found.      CIF dictionary      Interpreting this report

## Datablock: 4bp

---

Bond precision:    C-C = 0.0087 A                      Wavelength=0.71073

Cell:                      a=24.434(4)              b=20.026(3)              c=23.779(4)  
                                    alpha=90                      beta=118.706(2)              gamma=90

Temperature:              123 K

|                        | Calculated                           | Reported             |
|------------------------|--------------------------------------|----------------------|
| Volume                 | 10205(3)                             | 10205(3)             |
| Space group            | P 21/c                               | P2(1)/c              |
| Hall group             | -P 2ybc                              | ?                    |
| Moiety formula         | C84 H108 N6 O18, C12 H13<br>N2, F6 P | ?                    |
| Sum formula            | C96 H121 F6 N8 O18 P                 | C96 H121 F6 N8 O18 P |
| Mr                     | 1819.98                              | 1819.98              |
| Dx, g cm <sup>-3</sup> | 1.185                                | 1.185                |
| Z                      | 4                                    | 4                    |
| Mu (mm <sup>-1</sup> ) | 0.103                                | 0.103                |
| F000                   | 3864.0                               | 3864.0               |
| F000'                  | 3866.48                              |                      |
| h,k,lmax               | 29,23,28                             | 29,23,28             |
| Nref                   | 18170                                | 17763                |
| Tmin,Tmax              | 0.974,0.982                          | 0.972,0.982          |
| Tmin'                  | 0.972                                |                      |

Correction method= # Reported T Limits: Tmin=0.972 Tmax=0.982  
AbsCorr = MULTI-SCAN

Data completeness= 0.978                      Theta(max)= 25.100

R(reflections)= 0.1072( 8898)              wR2(reflections)= 0.3153( 17763)

S = 1.173                      Npar= 1263

---

The following ALERTS were generated. Each ALERT has the format

**test-name\_ALERT\_alert-type\_alert-level.**

Click on the hyperlinks for more details of the test.

---

### ● Alert level B

|                   |                                             |      |                         |     |       |
|-------------------|---------------------------------------------|------|-------------------------|-----|-------|
| PLAT220_ALERT_2_B | Large Non-Solvent                           | C    | Ueq(max)/Ueq(min) Range | 7.1 | Ratio |
| PLAT222_ALERT_3_B | Large Non-Solvent                           | H    | Uiso(max)/Uiso(min) ... | 8.1 | Ratio |
| PLAT250_ALERT_2_B | Large U3/U1 Ratio for Average U(i,j) Tensor | .... |                         | 4.6 | Note  |

---

### ● Alert level C

CRYSC01\_ALERT\_1\_C The word below has not been recognised as a standard identifier.

?

CRYSC01\_ALERT\_1\_C No recognised colour has been given for crystal colour.

RFACG01\_ALERT\_3\_C The value of the R factor is > 0.10

R factor given 0.107

RFACR01\_ALERT\_3\_C The value of the weighted R factor is > 0.25

Weighted R factor given 0.315

|                   |                                             |                                  |                         |        |        |
|-------------------|---------------------------------------------|----------------------------------|-------------------------|--------|--------|
| PLAT029_ALERT_3_C | _diffrn_measured_fraction_theta_full Low    | .....                            |                         | 0.978  | Note   |
| PLAT082_ALERT_2_C | High R1 Value                               | .....                            |                         | 0.11   | Report |
| PLAT084_ALERT_3_C | High wR2 Value (i.e. > 0.25)                | .....                            |                         | 0.32   | Report |
| PLAT213_ALERT_2_C | Atom O1A                                    | has ADP max/min Ratio            | ....                    | 3.7    | prolat |
| PLAT213_ALERT_2_C | Atom C66A                                   | has ADP max/min Ratio            | ....                    | 3.2    | prolat |
| PLAT220_ALERT_2_C | Large Non-Solvent                           | O                                | Ueq(max)/Ueq(min) Range | 5.4    | Ratio  |
| PLAT234_ALERT_4_C | Large Hirshfeld Difference                  | O1A -- C57A                      | ..                      | 0.17   | Ang.   |
| PLAT234_ALERT_4_C | Large Hirshfeld Difference                  | C21A -- C22A                     | ..                      | 0.18   | Ang.   |
| PLAT234_ALERT_4_C | Large Hirshfeld Difference                  | C80A -- C81A                     | ..                      | 0.18   | Ang.   |
| PLAT241_ALERT_2_C | High                                        | Ueq as Compared to Neighbors for | ....                    | C25A   | Check  |
| PLAT241_ALERT_2_C | High                                        | Ueq as Compared to Neighbors for | ....                    | C73A   | Check  |
| PLAT241_ALERT_2_C | High                                        | Ueq as Compared to Neighbors for | ....                    | N2     | Check  |
| PLAT242_ALERT_2_C | Low                                         | Ueq as Compared to Neighbors for | ....                    | O4A    | Check  |
| PLAT242_ALERT_2_C | Low                                         | Ueq as Compared to Neighbors for | ....                    | O5A    | Check  |
| PLAT242_ALERT_2_C | Low                                         | Ueq as Compared to Neighbors for | ....                    | N1A    | Check  |
| PLAT242_ALERT_2_C | Low                                         | Ueq as Compared to Neighbors for | ....                    | C24A   | Check  |
| PLAT242_ALERT_2_C | Low                                         | Ueq as Compared to Neighbors for | ....                    | C57A   | Check  |
| PLAT242_ALERT_2_C | Low                                         | Ueq as Compared to Neighbors for | ....                    | C75A   | Check  |
| PLAT242_ALERT_2_C | Low                                         | Ueq as Compared to Neighbors for | ....                    | C80A   | Check  |
| PLAT250_ALERT_2_C | Large U3/U1 Ratio for Average U(i,j) Tensor | ....                             |                         | 3.3    | Note   |
| PLAT340_ALERT_3_C | Low Bond Precision on C-C Bonds             | .....                            |                         | 0.0087 | Ang.   |
| PLAT360_ALERT_2_C | Short C(sp3)-C(sp3) Bond                    | C81A - C82A                      | ..                      | 1.38   | Ang.   |
| PLAT410_ALERT_2_C | Short Intra H...H Contact                   | H5 .. H9                         | ..                      | 1.99   | Ang.   |
| PLAT412_ALERT_2_C | Short Intra XH3 .. XHn                      | H73A .. H78C                     | ..                      | 1.86   | Ang.   |
| PLAT412_ALERT_2_C | Short Intra XH3 .. XHn                      | H75A .. H78A                     | ..                      | 1.88   | Ang.   |
| PLAT413_ALERT_2_C | Short Inter XH3 .. XHn                      | H11 .. H28A                      | ..                      | 2.01   | Ang.   |

---

### ● Alert level G

|                   |                                                  |                   |  |             |        |
|-------------------|--------------------------------------------------|-------------------|--|-------------|--------|
| PLAT002_ALERT_2_G | Number of Distance or Angle Restraints on AtSite |                   |  | 22          | Note   |
| PLAT003_ALERT_2_G | Number of Uiso or Uij Restrained non-H Atoms     | ...               |  | 138         | Report |
| PLAT005_ALERT_5_G | No _iucr_refine_instructions_details in the CIF  |                   |  | Please Do ! |        |
| PLAT066_ALERT_1_G | Predicted and Reported Tmin&Tmax Range Identical |                   |  | ?           | Check  |
| PLAT072_ALERT_2_G | SHELXL First Parameter in WGHT Unusually Large.  |                   |  | 0.15        | Report |
| PLAT300_ALERT_4_G | Atom Site Occupancy of *C77A                     | is Constrained at |  | 0.500       | Check  |
| PLAT300_ALERT_4_G | Atom Site Occupancy of *C77B                     | is Constrained at |  | 0.500       | Check  |
| PLAT300_ALERT_4_G | Atom Site Occupancy of *C78A                     | is Constrained at |  | 0.500       | Check  |
| PLAT300_ALERT_4_G | Atom Site Occupancy of *C78B                     | is Constrained at |  | 0.500       | Check  |
| PLAT300_ALERT_4_G | Atom Site Occupancy of *H77A                     | is Constrained at |  | 0.500       | Check  |
| PLAT300_ALERT_4_G | Atom Site Occupancy of *H77B                     | is Constrained at |  | 0.500       | Check  |
| PLAT300_ALERT_4_G | Atom Site Occupancy of *H77C                     | is Constrained at |  | 0.500       | Check  |

|                   |                                                    |                   |       |       |
|-------------------|----------------------------------------------------|-------------------|-------|-------|
| PLAT300_ALERT_4_G | Atom Site Occupancy of *H77D                       | is Constrained at | 0.500 | Check |
| PLAT300_ALERT_4_G | Atom Site Occupancy of *H78A                       | is Constrained at | 0.500 | Check |
| PLAT300_ALERT_4_G | Atom Site Occupancy of *H78B                       | is Constrained at | 0.500 | Check |
| PLAT300_ALERT_4_G | Atom Site Occupancy of *H78C                       | is Constrained at | 0.500 | Check |
| PLAT300_ALERT_4_G | Atom Site Occupancy of *H78D                       | is Constrained at | 0.500 | Check |
| PLAT300_ALERT_4_G | Atom Site Occupancy of *H78E                       | is Constrained at | 0.500 | Check |
| PLAT300_ALERT_4_G | Atom Site Occupancy of *H78F                       | is Constrained at | 0.500 | Check |
| PLAT300_ALERT_4_G | Atom Site Occupancy of *F1                         | is Constrained at | 0.500 | Check |
| PLAT300_ALERT_4_G | Atom Site Occupancy of *F2                         | is Constrained at | 0.500 | Check |
| PLAT300_ALERT_4_G | Atom Site Occupancy of *F3                         | is Constrained at | 0.500 | Check |
| PLAT300_ALERT_4_G | Atom Site Occupancy of *F4                         | is Constrained at | 0.500 | Check |
| PLAT300_ALERT_4_G | Atom Site Occupancy of *F5                         | is Constrained at | 0.500 | Check |
| PLAT300_ALERT_4_G | Atom Site Occupancy of *F6                         | is Constrained at | 0.500 | Check |
| PLAT300_ALERT_4_G | Atom Site Occupancy of *F1'                        | is Constrained at | 0.500 | Check |
| PLAT300_ALERT_4_G | Atom Site Occupancy of *F1'                        | is Constrained at | 0.500 | Check |
| PLAT300_ALERT_4_G | Atom Site Occupancy of *F2'                        | is Constrained at | 0.500 | Check |
| PLAT300_ALERT_4_G | Atom Site Occupancy of *F3'                        | is Constrained at | 0.500 | Check |
| PLAT300_ALERT_4_G | Atom Site Occupancy of *F4'                        | is Constrained at | 0.500 | Check |
| PLAT300_ALERT_4_G | Atom Site Occupancy of *F5'                        | is Constrained at | 0.500 | Check |
| PLAT300_ALERT_4_G | Atom Site Occupancy of *F6'                        | is Constrained at | 0.500 | Check |
| PLAT301_ALERT_3_G | Main Residue Disorder .....                        | Percentage =      | 2     | Note  |
| PLAT302_ALERT_4_G | Anion/Solvent Disorder .....                       | Percentage =      | 100   | Note  |
| PLAT304_ALERT_4_G | Non-Integer Number of Atoms ( 3.50) in Resd. #     |                   | 3     | Check |
| PLAT304_ALERT_4_G | Non-Integer Number of Atoms ( 3.50) in Resd. #     |                   | 4     | Check |
| PLAT432_ALERT_2_G | Short Inter X...Y Contact F1' .. C66A ..           |                   | 2.68  | Ang.  |
| PLAT432_ALERT_2_G | Short Inter X...Y Contact F4' .. C25A ..           |                   | 2.92  | Ang.  |
| PLAT432_ALERT_2_G | Short Inter X...Y Contact O10A .. C4 ..            |                   | 2.98  | Ang.  |
| PLAT432_ALERT_2_G | Short Inter X...Y Contact O13A .. C10A ..          |                   | 3.01  | Ang.  |
| PLAT606_ALERT_4_G | VERY LARGE Solvent Accessible VOID(S) in Structure |                   | !     | Info  |
| PLAT720_ALERT_4_G | Number of Unusual/Non-Standard Labels .....        |                   | 3     | Note  |
| PLAT779_ALERT_4_G | Suspect or Irrelevant (Bond) Angle in CIF .... #   |                   | 356   | Check |
|                   | C77A -C74A -C77B 1.555 1.555 1.555                 |                   | 12.00 | Deg.  |
| PLAT860_ALERT_3_G | Number of Least-Squares Restraints .....           |                   | 2166  | Note  |
| PLAT869_ALERT_4_G | ALERTS Related to the use of SQUEEZE Suppressed    |                   | !     | Info  |
| PLAT899_ALERT_4_G | SHELXL97 is Deprecated and Succeeded by SHELXL     |                   | 2014  | Note  |

---

0 **ALERT level A** = Most likely a serious problem - resolve or explain  
3 **ALERT level B** = A potentially serious problem, consider carefully  
30 **ALERT level C** = Check. Ensure it is not caused by an omission or oversight  
47 **ALERT level G** = General information/check it is not something unexpected

3 **ALERT type 1** CIF construction/syntax error, inconsistent or missing data  
29 **ALERT type 2** Indicator that the structure model may be wrong or deficient  
8 **ALERT type 3** Indicator that the structure quality may be low  
39 **ALERT type 4** Improvement, methodology, query or suggestion  
1 **ALERT type 5** Informative message, check

---

It is advisable to attempt to resolve as many as possible of the alerts in all categories. Often the minor alerts point to easily fixed oversights, errors and omissions in your CIF or refinement strategy, so attention to these fine details can be worthwhile. In order to resolve some of the more serious problems it may be necessary to carry out additional measurements or structure refinements. However, the purpose of your study may justify the reported deviations and the more serious of these should normally be commented upon in the discussion or experimental section of a paper or in the "special\_details" fields of the CIF. checkCIF was carefully designed to identify outliers and unusual parameters, but every test has its limitations and alerts that are not important in a particular case may appear. Conversely, the absence of alerts does not guarantee there are no aspects of the results needing attention. It is up to the individual to critically assess their own results and, if necessary, seek expert advice.

### **Publication of your CIF in IUCr journals**

A basic structural check has been run on your CIF. These basic checks will be run on all CIFs submitted for publication in IUCr journals (*Acta Crystallographica*, *Journal of Applied Crystallography*, *Journal of Synchrotron Radiation*); however, if you intend to submit to *Acta Crystallographica Section C* or *E*, you should make sure that full publication checks are run on the final version of your CIF prior to submission.

### **Publication of your CIF in other journals**

Please refer to the *Notes for Authors* of the relevant journal for any special instructions relating to CIF submission.

---

**PLATON version of 21/06/2015; check.def file version of 21/06/2015**

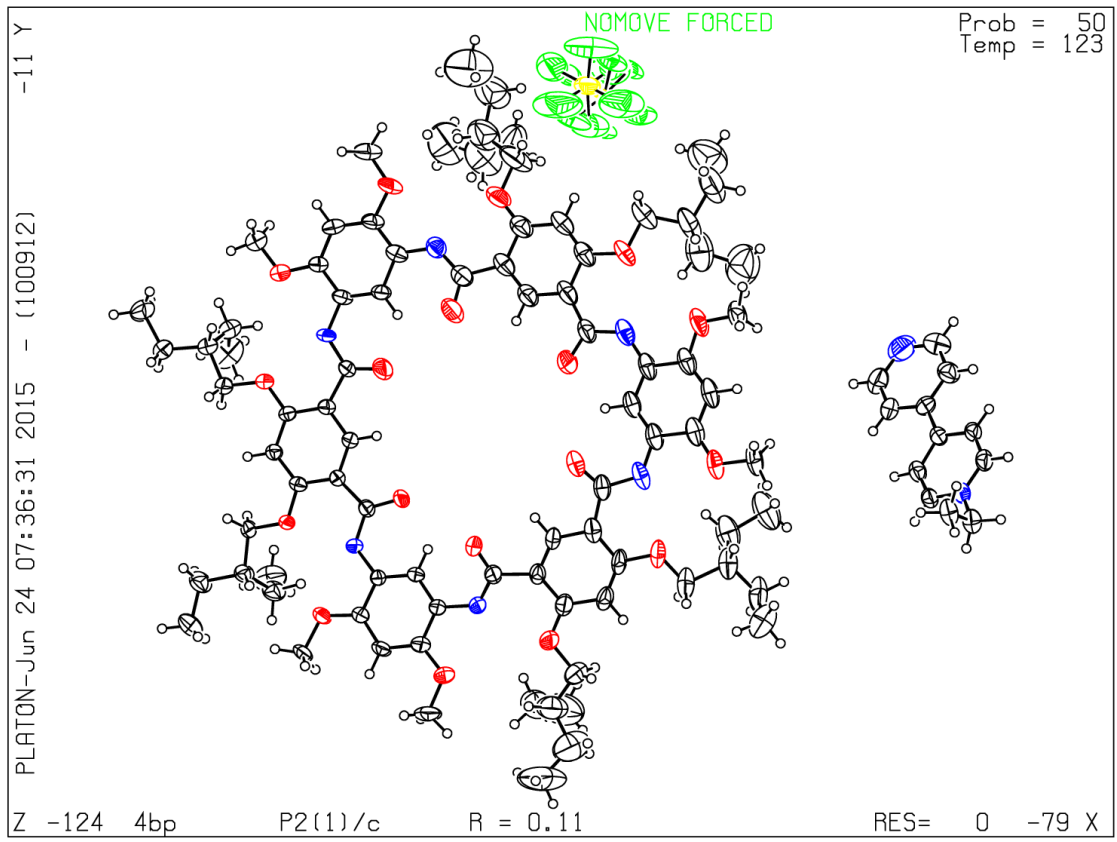

Supplement: Additional file 1 [file 1860-5397-21-10-S1.pdf]
